# Supplementary material for: The NCF1 variant p.R90H aggravates autoimmunity by facilitating the activation of plasmacytoid dendritic cells
Source: PubMed Central journal article supplement (PMC9374378; doi:10.1172/jci153619), 2022-08-15
Supplement: jci-132-153619-s061.pdf [file jci-132-153619-s061.pdf]

1 **Supplemental Figures**

A

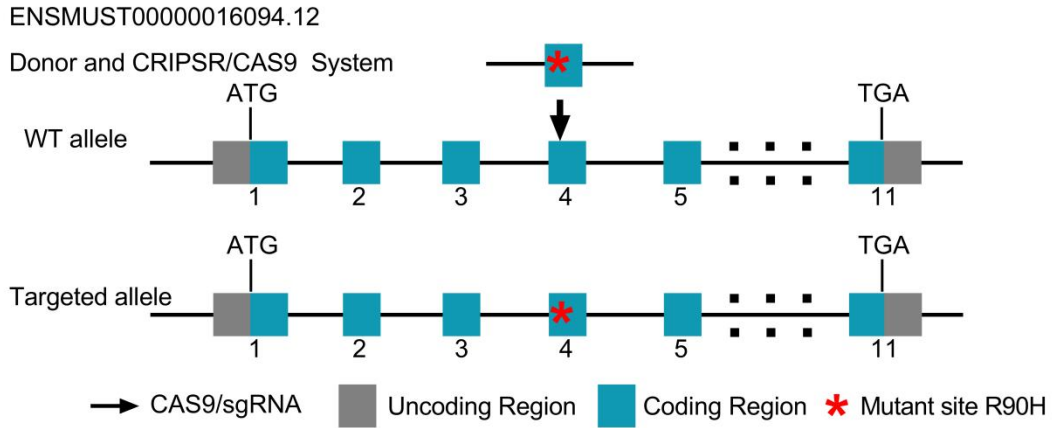

B

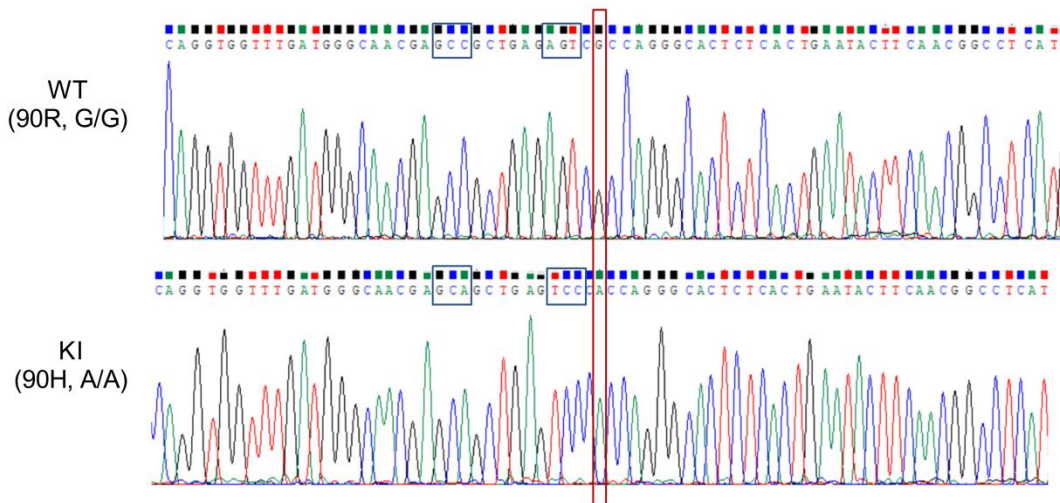

2

3 **Supplemental Figure 1. Strategy of constructing KI mice.** (A) KI mice were  
4 generated by using CRISPR/CAS9 gene editing and homologous recombination  
5 technique. (B) Verification of p.90R to p.90H mutation in KI mice. The black squares  
6 indicate the position of synonymous codon substitution.

7

8

9

A

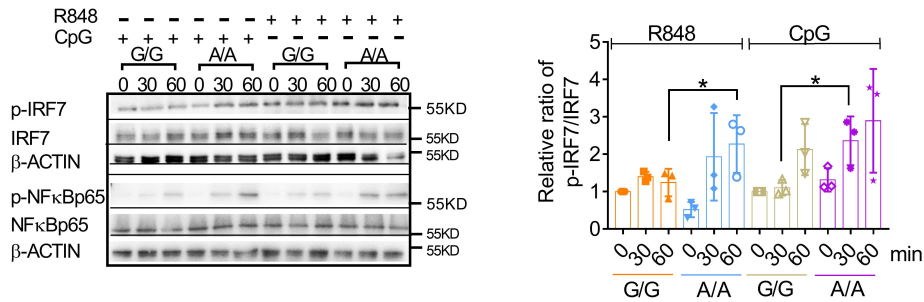

B

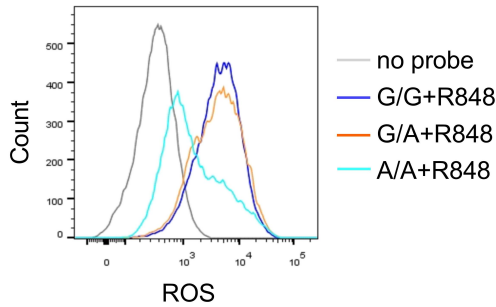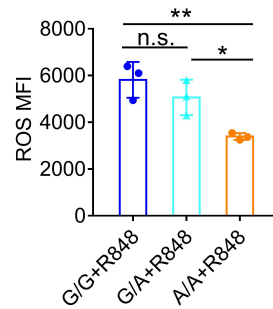

C

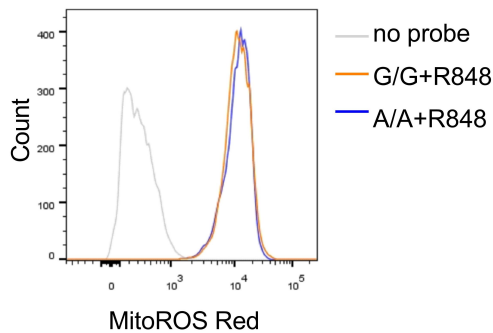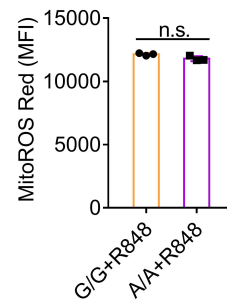

10

11 **Supplemental Figure 2. The activation and ROS levels of pDCs with different**  
 12 **alleles.** (A) G/G and A/A pDCs were generated by FLT3L induction. Then, pDCs  
 13 were sorted and stimulated with R848 or CpG for indicated time. The levels of  
 14 phospho-IRF7 (p-IRF7), IRF7, phospho-NFκB p65 (p-NFκBp65) and NFκBp65  
 15 were detected. β-ACTIN was used as loading control. *p* value was determined by a  
 16 two-tailed paired *t* test. Error bars represent SEM. (\**p*<0.05). *n*=3. (B, C) Splenic  
 17 pDCs from G/G, G/A and A/A mice were stimulated with R848 for 1 hour and then  
 18 analyzed by FACS. The levels of (B) ROS and (C) mitochondrial ROS are shown. *p*  
 19 values were determined by one-way ANOVA with Tukey's multiple comparison test.  
 20 Error bars represent SEM. (\**p*<0.05, \*\**p*<0.01, n.s. not significant).

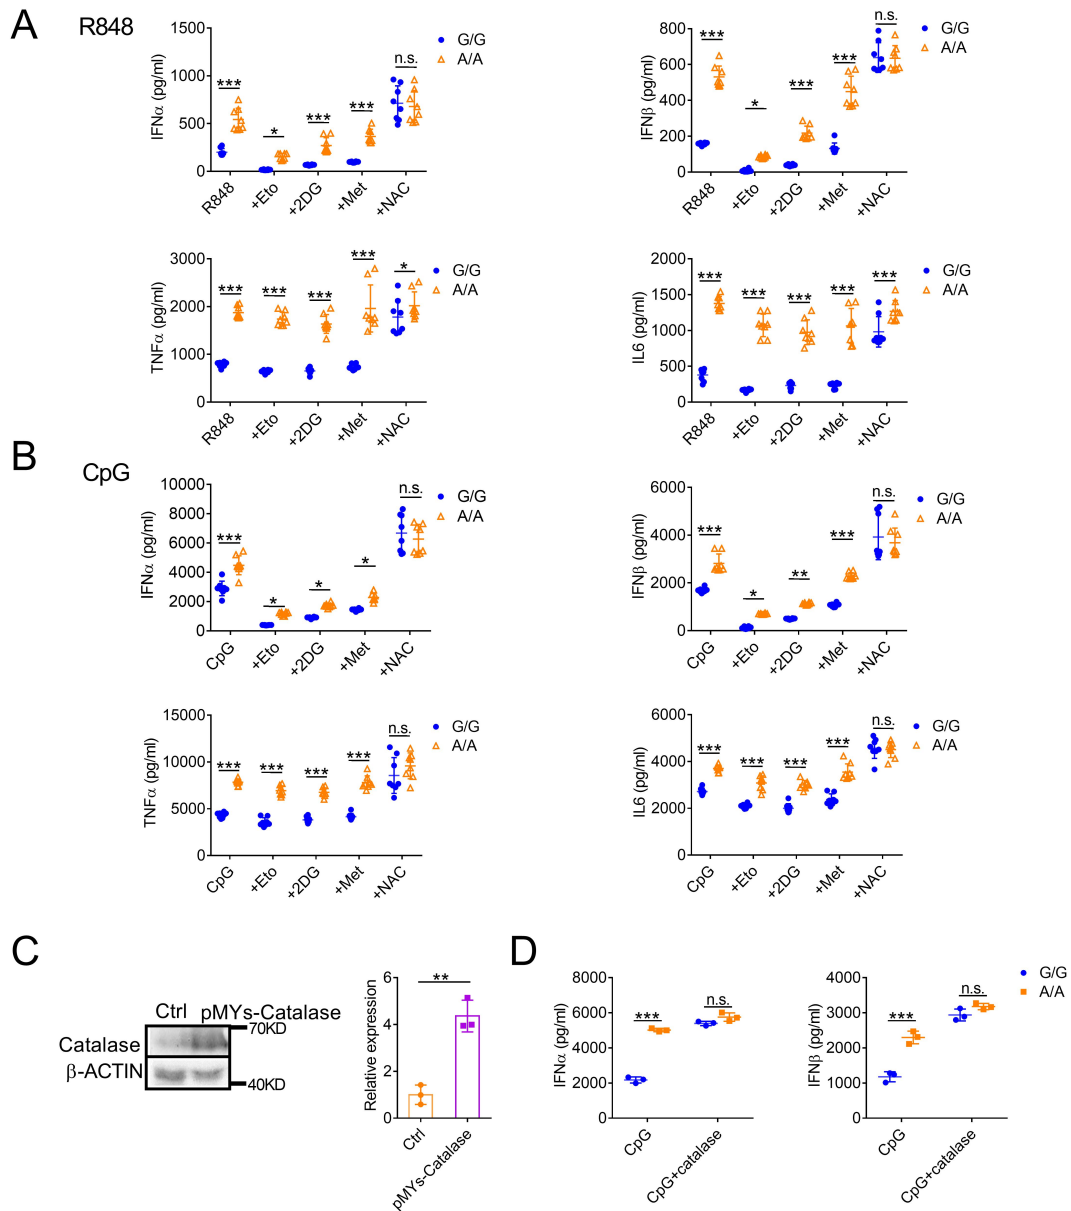

21

22 **Supplemental Figure 3. ROS scavenger eliminates the difference in the**  
 23 **production of IFN-I resulted from NCF1 p.R90H.** PDCs were pretreated with or  
 24 without etomoxir (Eto), 2-DG, metformin (Met), or NAC for 2 hours and then  
 25 stimulated with (A) R848 or (B) CpG for 24 hours. The expression of IFN $\alpha$ , IFN $\beta$ ,  
 26 TNF $\alpha$  and IL6 were detected. n=8. (C, D) Bone marrow progenitors from WT or KI  
 27 mice were transfected with empty or Catalase overexpressing lentivirus, and followed  
 28 by 8-day FLT3L induction. PDCs were sorted and stimulated with CpG for 24 hours.  
 29 (C) The overexpression of Catalase. *p* value was determined by a two-tailed paired *t*  
 30 test. Error bars represent SEM. (\**p*<0.05). n=3. (D) The expression of IFN $\alpha$  and IFN $\beta$ .  
 31 n=3. *p* values were determined by two-way ANOVA. Error bars represent SEM.  
 32 (\**p*<0.05, \*\**p*<0.01, n.s. not significant).

33

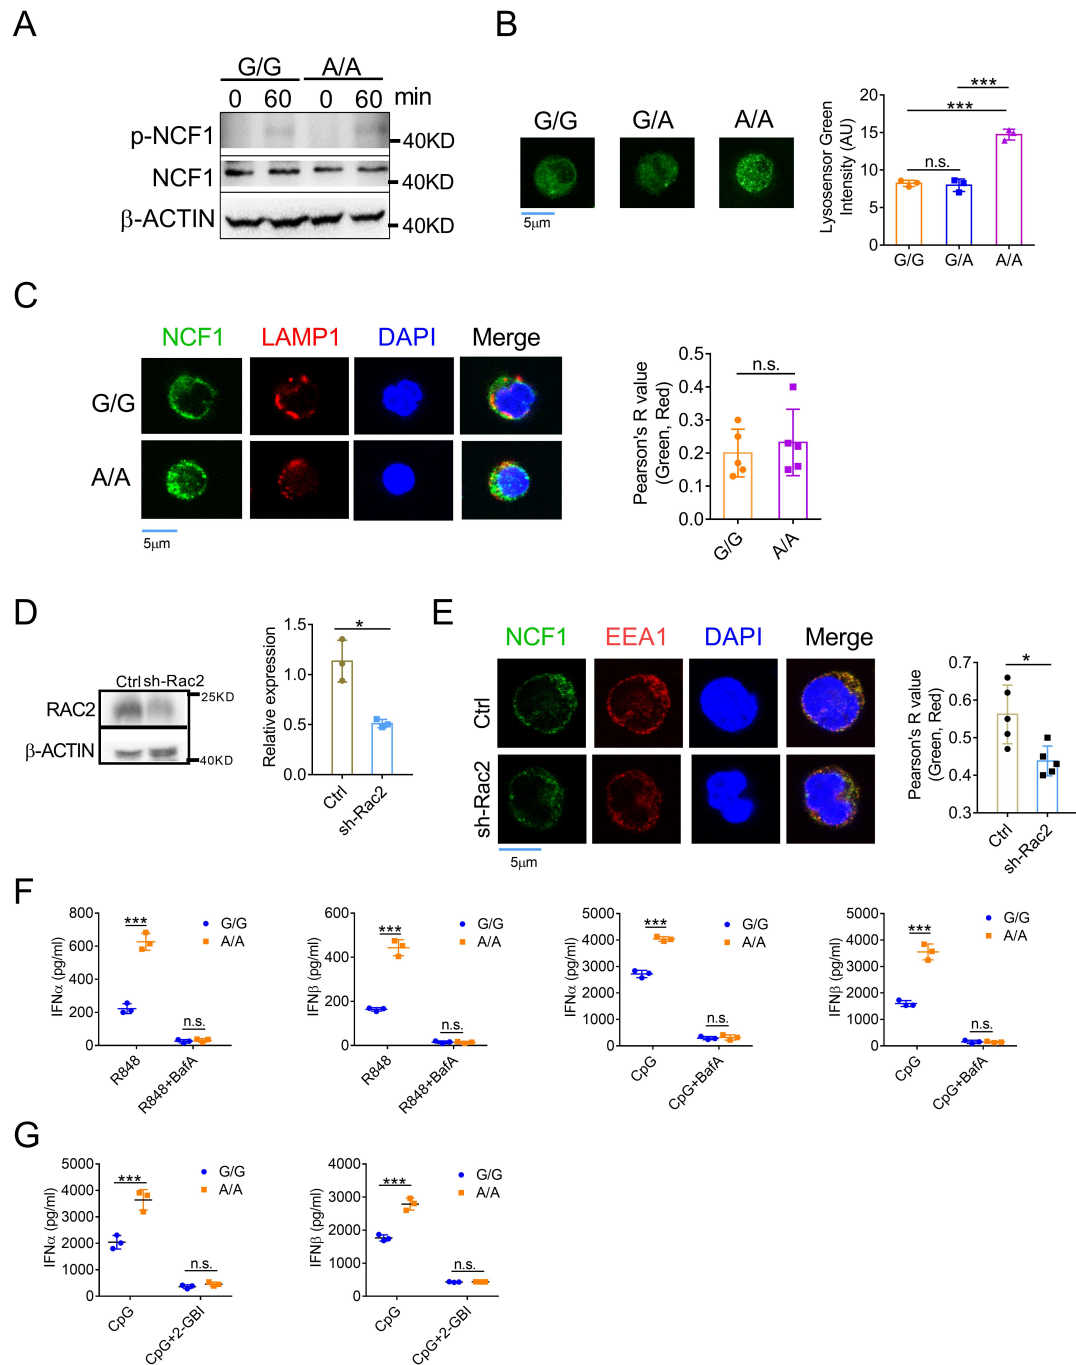

34  
 35 **Supplemental Figure 4. The mechanism of NCF1 p.R90H variation on the**  
 36 **activation of pDCs.** (A-C) G/G, G/A and A/A pDCs generated by FLT3L induction in  
 37 vitro were stimulated with CpG for 1 hour. (A) The levels of phospho-NCF1 (p-NCF1)  
 38 and NCF1 were detected. β-ACTIN was used as loading control. (B) The pH of late  
 39 endosome/lysosome was indicated by lysosome sensor, detected by con-focal, and  
 40 then measured by Image J. One point indicates mean of Pearson's R values from 10  
 41 cells and total of 30 cells per group were calculated. Scale bar represents 5 μm. p  
 42 values were determined by one-way ANOVA with Tukey's multiple comparison test.  
 43 (C) The co-localization of NCF1 (green) and LAMP1 (Red) was detected by confocal  
 44 microscopy and analyzed by Image J. (D, E) Lineage<sup>c-kit</sup><sup>hi</sup> bone marrow progenitors



45 were isolated from WT mice by using FACS. Lentivirus expressing shRNA specific  
46 targeting *Rac2* was transduced into bone marrow progenitors. Cells were cultured  
47 with 200ng/mL FLT3L for 8 days. Then pDCs were sorted and subjected to further  
48 study. (D) Western blot detection of RAC2. n=3. *p* values were determined by a  
49 two-tailed paired *t* test. (E) PDCs transfected with empty (Ctrl) or shRNA lentivirus  
50 targeting *Rac2* (sh-*Rac2*) were stimulated with CpG for 2 hours. The co-localization  
51 of NCF1 (green) and EEA1 (Red) was detected by confocal microscopy and analyzed  
52 by Image J. One point indicates mean of Pearson's R values from 6 cells and total of  
53 30 cells per group were calculated. Scale bar represents 5  $\mu$ m. *p* values were  
54 determined by a one or two-tailed unpaired *t* test. Error bars represent SEM. (n.s. not  
55 significant). (F) PDCs were pre-treated with or without 100nM bafilomycin A (BafA)  
56 for 1 hour and then stimulated with 10 $\mu$ g/mL R848 or 0.5 $\mu$ M ODN2216 (CpG) for 24  
57 hours. (G) PDCs were pre-treated with or without 2-GBI for 1 hour and then  
58 stimulated with 0.5 $\mu$ M ODN2216 (CpG) for 24 hours. The expression of type I IFNs  
59 in supernatant was detected by ELISA. n=3. Data were analyzed by using two-way  
60 ANOVA. Error bars represent SEM. (\**p*<0.05, \*\*\**p*<0.001, n.s. not significant).

61

62

63

64

65

66

67

68

69

70

71

72

73

74

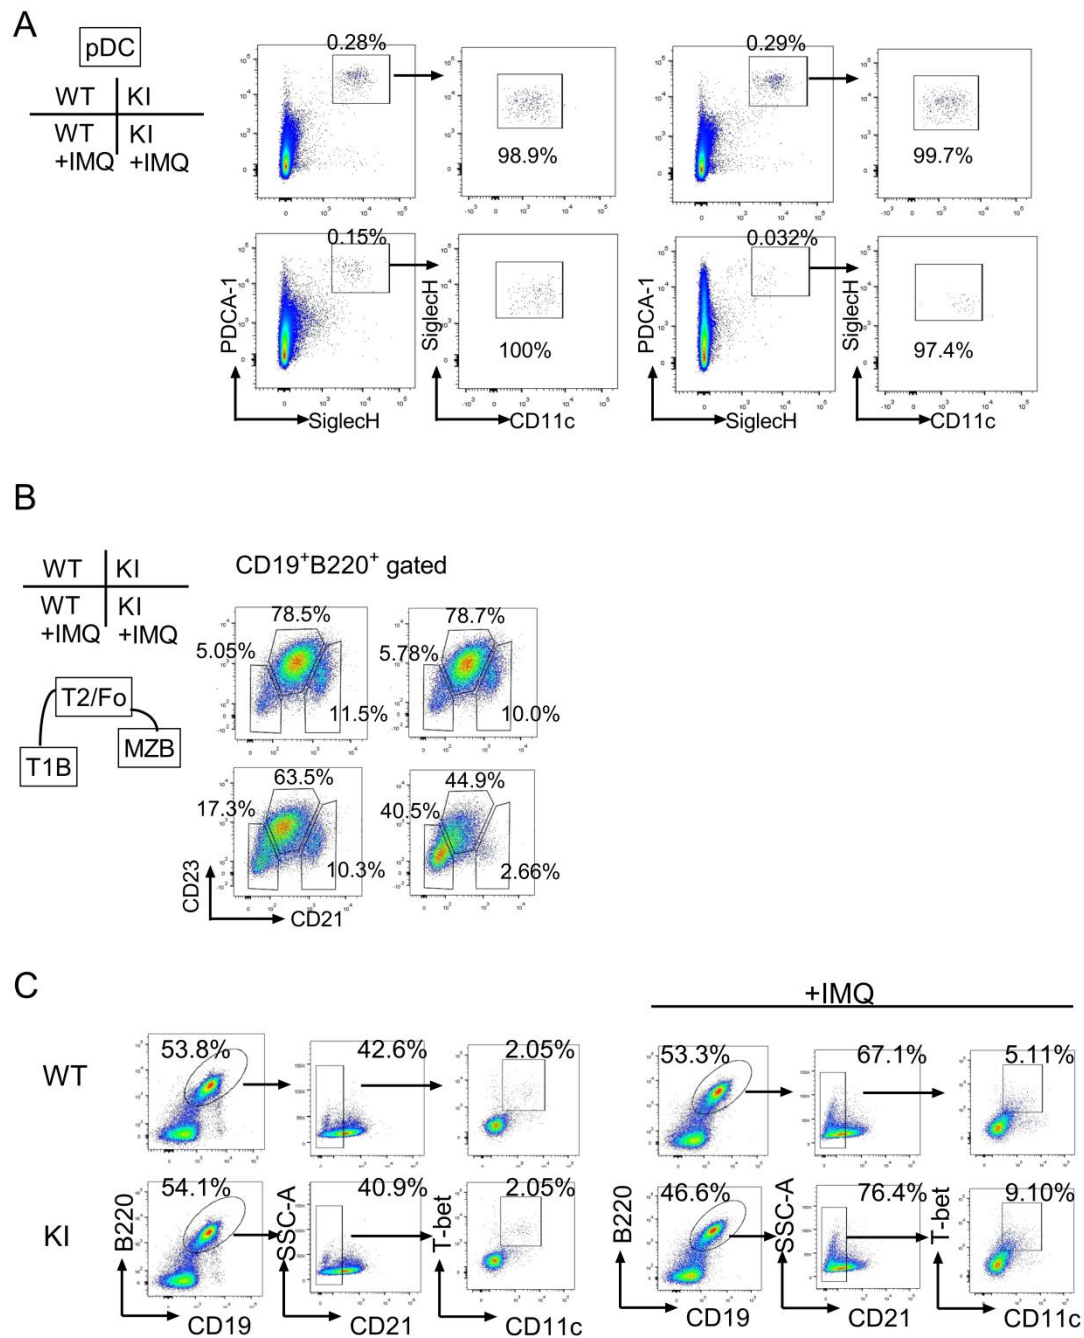

75

76 **Supplemental Figure 5. NCF1 p.R90H facilitates the aberrant activation of pDC**  
 77 **and B cells.** The cellular gating strategies of (A) pDCs (CD11c<sup>int</sup>, SiglechH<sup>+</sup>, PDCA-1<sup>+</sup>)  
 78 and (B) B cells subsets, including MZB (CD19<sup>+</sup>, B220<sup>+</sup>, CD21<sup>hi</sup>, CD23<sup>-</sup>), T2/Fo B  
 79 cells (CD19<sup>+</sup>, B220<sup>+</sup>, CD21<sup>lo</sup>, CD23<sup>hi</sup>), T1 B cells (CD19<sup>+</sup>, B220<sup>+</sup>, CD21<sup>-</sup>, CD23<sup>-</sup>) and  
 80 (C) ABC cells (CD19<sup>+</sup>, B220<sup>+</sup>, CD21<sup>-</sup>, CD11c<sup>+</sup>, T-bet<sup>+</sup>) in Figure 4 are shown.

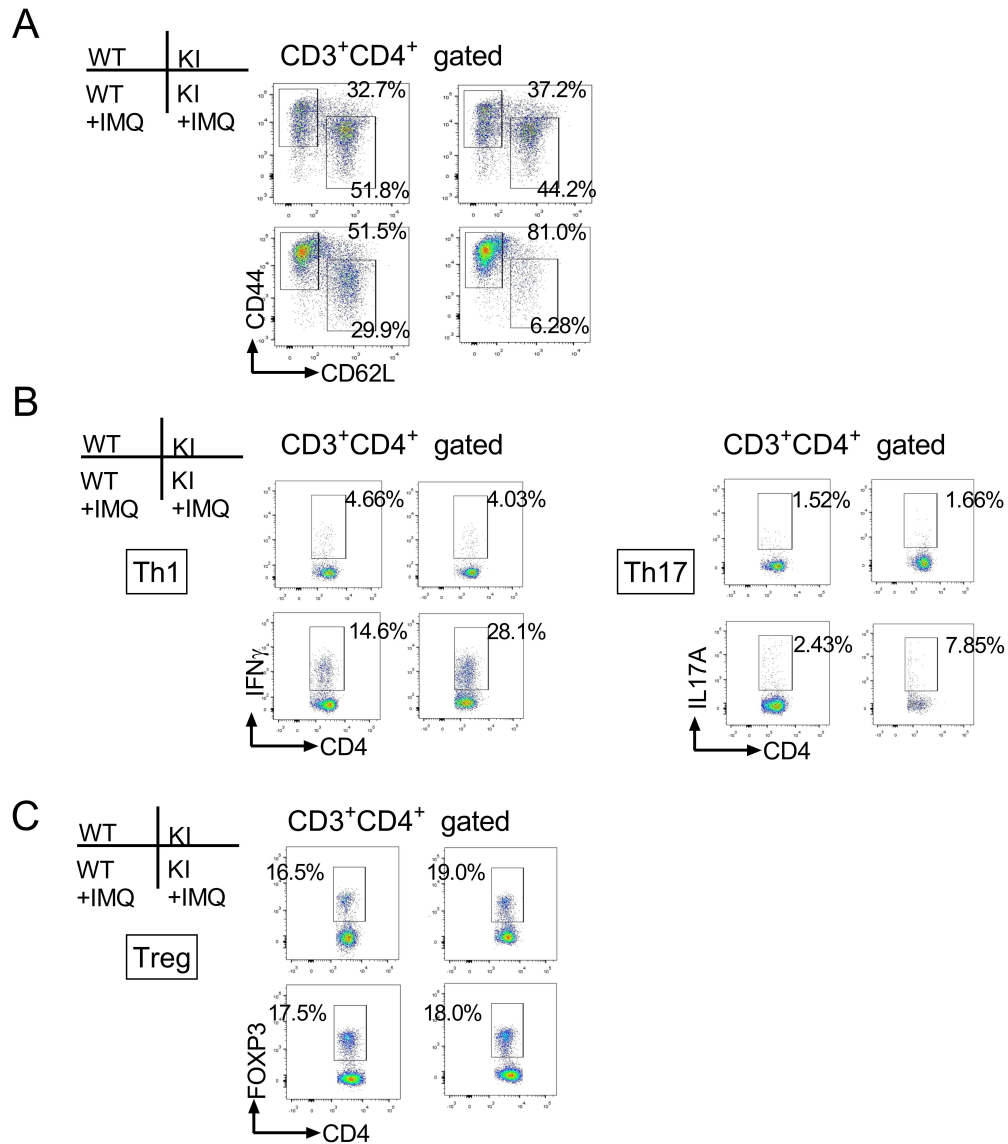

81

82 **Supplemental Figure 6. NCF1 p.R90H facilitates the aberrant activation of T**

83 **cells.** (A) The FACS analysis of naïve T cells (CD3<sup>+</sup>, CD4<sup>+</sup>, CD44<sup>lo</sup>, CD62L<sup>hi</sup>),

84 activated T cells (CD3<sup>+</sup>, CD4<sup>+</sup>, CD44<sup>hi</sup>, CD62L<sup>lo</sup>), (B) Th1 (CD3<sup>+</sup>, CD4<sup>+</sup>, IFN $\gamma$ <sup>+</sup>),

85 Th17 (CD3<sup>+</sup>, CD4<sup>+</sup>, IL-17A<sup>+</sup>) and (C) Treg (CD3<sup>+</sup>, CD4<sup>+</sup>, Foxp3<sup>+</sup>) in Figure 4 are

86 shown.

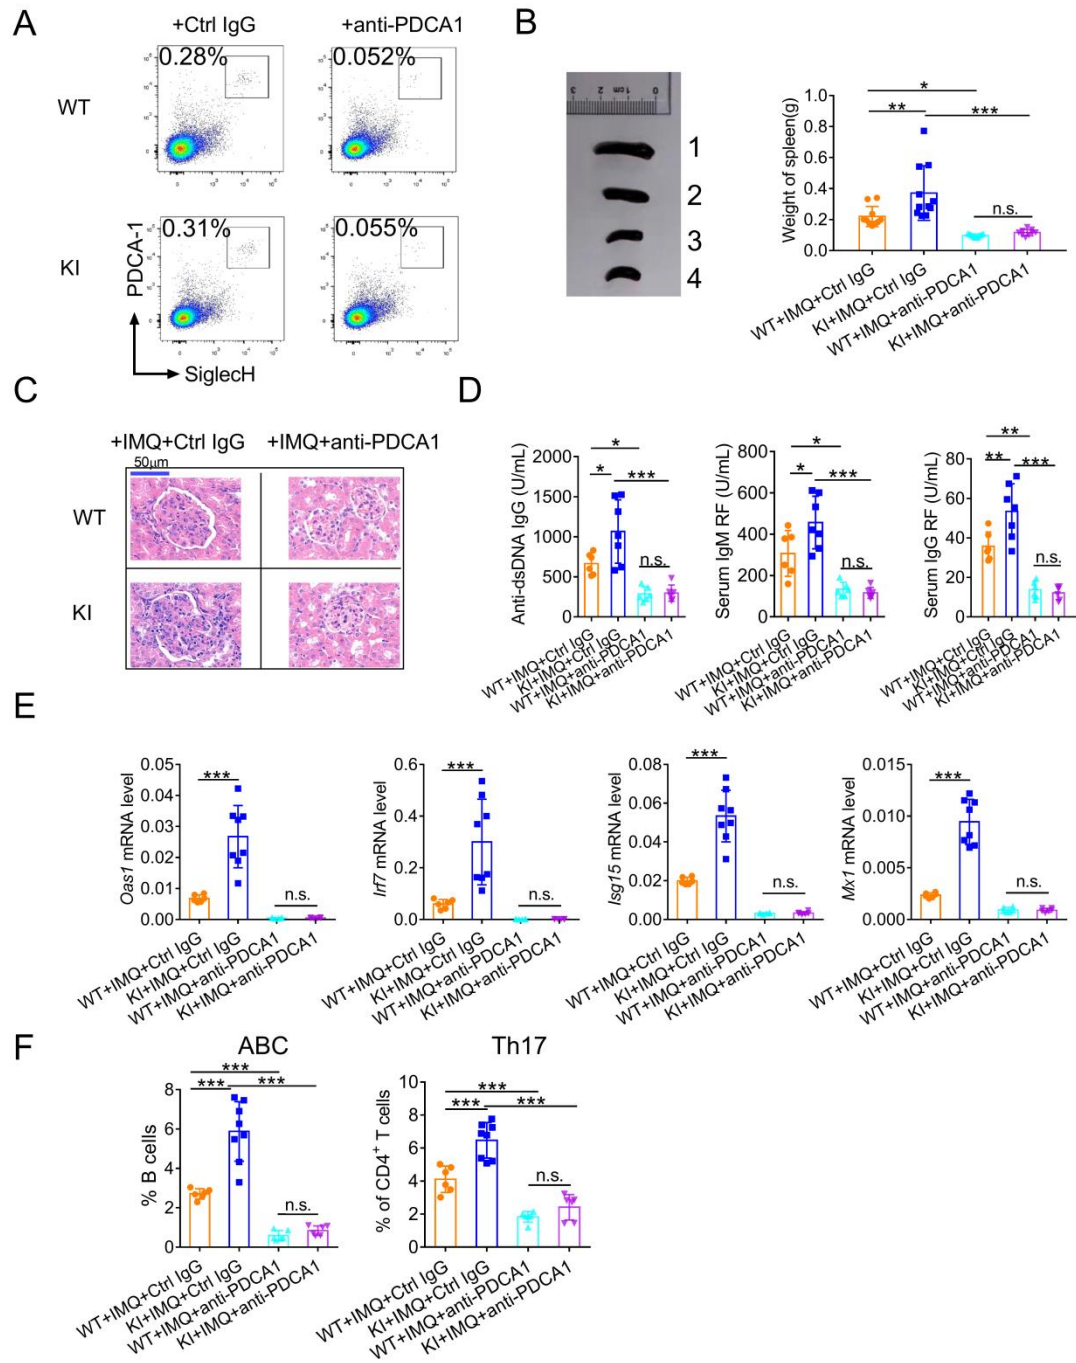

87  
 88 **Supplemental Figure 7. PDC depletion eliminates the pathogenic aggravation**  
 89 **caused by NCF1 p.R90H.** (A) WT and KI mice were intraperitoneally pre-treated  
 90 with anti-PDCA1 antibody (anti-PDCA1) or rat IgG2b isotype control (Ctrl IgG) 4  
 91 days before IMQ application. The efficiency of pDC depletion. (B-F) Mice were then  
 92 treated with IMQ, together with Ctrl IgG or anti-PDCA1 antibodies for 8 weeks. (B)  
 93 The picture and the weight of spleen. n=9-11. 1, WT+IMQ+Ctrl IgG; 2,  
 94 KI+IMQ+Ctrl IgG; 3, WT+IMQ+anti-PDCA1; 4, KI+IMQ+anti-PDCA1. (C) H&E  
 95 staining of kidney. (D) The levels of anti-dsDNA antibodies, serum IgM RF and IgG  
 96 RF. (E) The expression of *Oas1*, *Irf7*, *Isg15* and *Mx1* in the kidney of mice. (F) FACS  
 97 analysis of ABCs and Th17 cells in the spleen. n=6-8. Data were analyzed by using

98 one-way ANOVA with Tukey's multiple comparison test. Error bars represent SEM.  
99 (\*p<0.05, \*\*p<0.01, \*\*\*p<0.001, n.s. not significant).

100  
101  
102  
103  
104  
105  
106  
107  
108  
109  
110  
111  
112  
113  
114  
115  
116  
117  
118  
119  
120  
121  
122  
123  
124  
125  
126  
127  
128  
129  
130  
131  
132  
133  
134

A

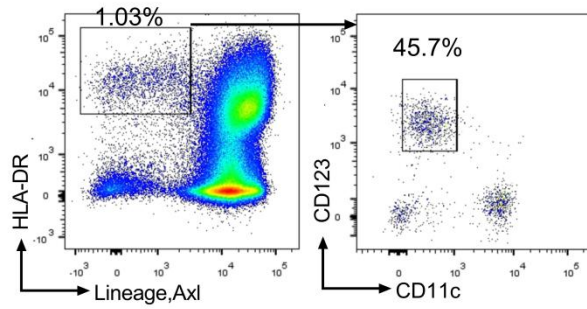

B

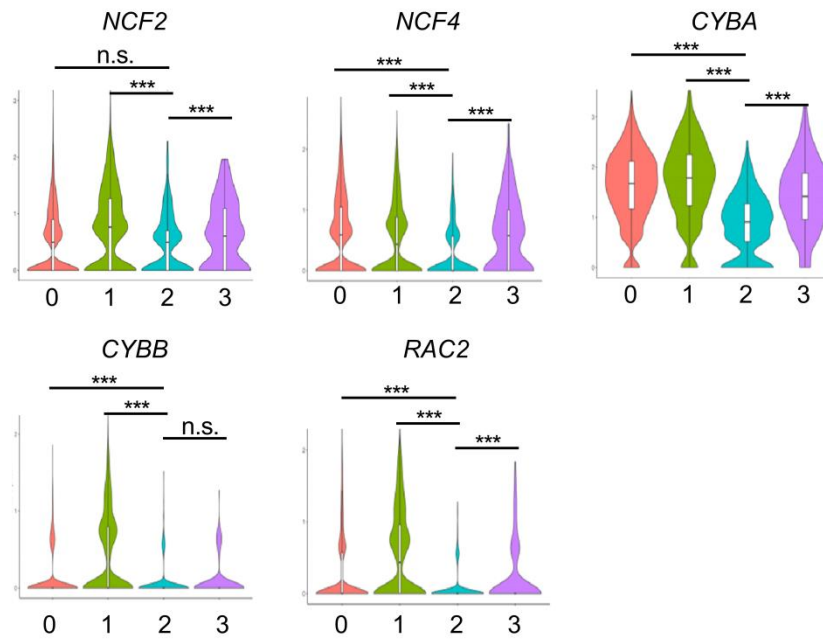

135

136

137

138

139

140

141

142

143

144

145

146

147

**Supplemental Figure 8. Sorting strategy of human primary pDCs.** (A) pDCs were sorted as Lineage<sup>-</sup> (CD3/CD14/CD16/CD19/CD20/CD56), HLA-DR<sup>+</sup>, CD11c<sup>-</sup>, AXL<sup>-</sup>, CD123<sup>+</sup>. The purity of pDCs was >99.9%. (B) The expression of *NCF2*, *NCF4*, *CYBA*, *CYBB* and *RAC2* in pDC subpopulations. *p* values were determined by using Wilcoxon test. (\*\*\*)*p*<0.001).



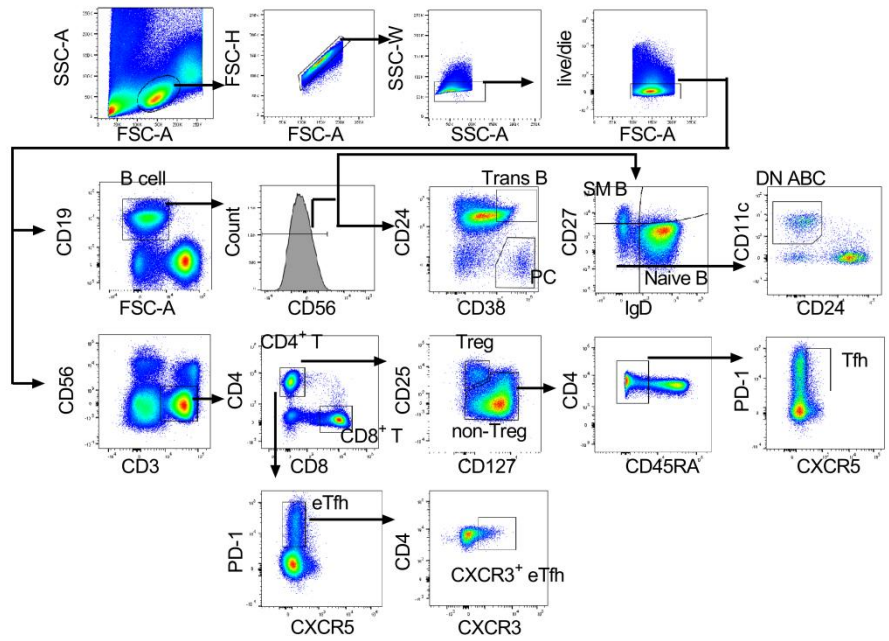

148

149 **Supplemental Figure 9. Gating strategies of immune cells subsets from SLE**  
 150 **patients.** Samples in Figure 6 were analyzed by FACS using indicated markers.

151

152

153

154

155

156

157

158

159

160

161

162

A

R848

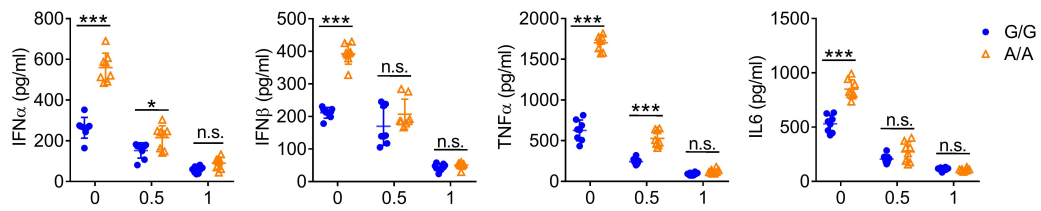

B

CpG

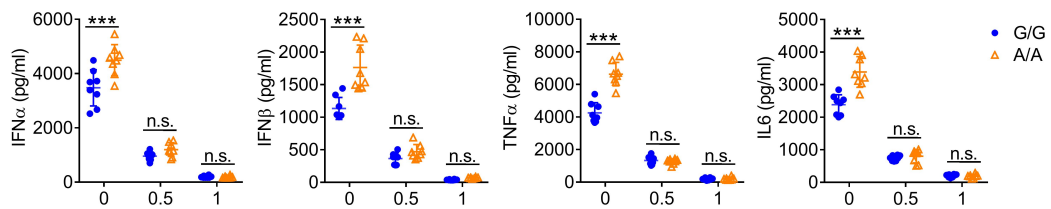

163

164

**Supplemental Figure 10. HCQ alleviates the excessive activation of pDCs**

165

**resulted from NCF1 p.R90H. (A, B) Splenic pDCs were pre-treated with 0, 0.5 or 1**

166

**$\mu$ M HCQ for 2 hours, and then stimulated with R848 or CpG for 24 hours. The**

167

**expression of IFN $\alpha$ , IFN $\beta$ , TNF $\alpha$  and IL6 was detected. n=8. *p* values were**

168

**determined by two-way ANOVA. Error bars represent SEM. (\**p*<0.05, \*\**p*<0.01,**

169

**\*\*\**p*<0.001, n.s. not significant).**

170

171

172

173

174

175

176

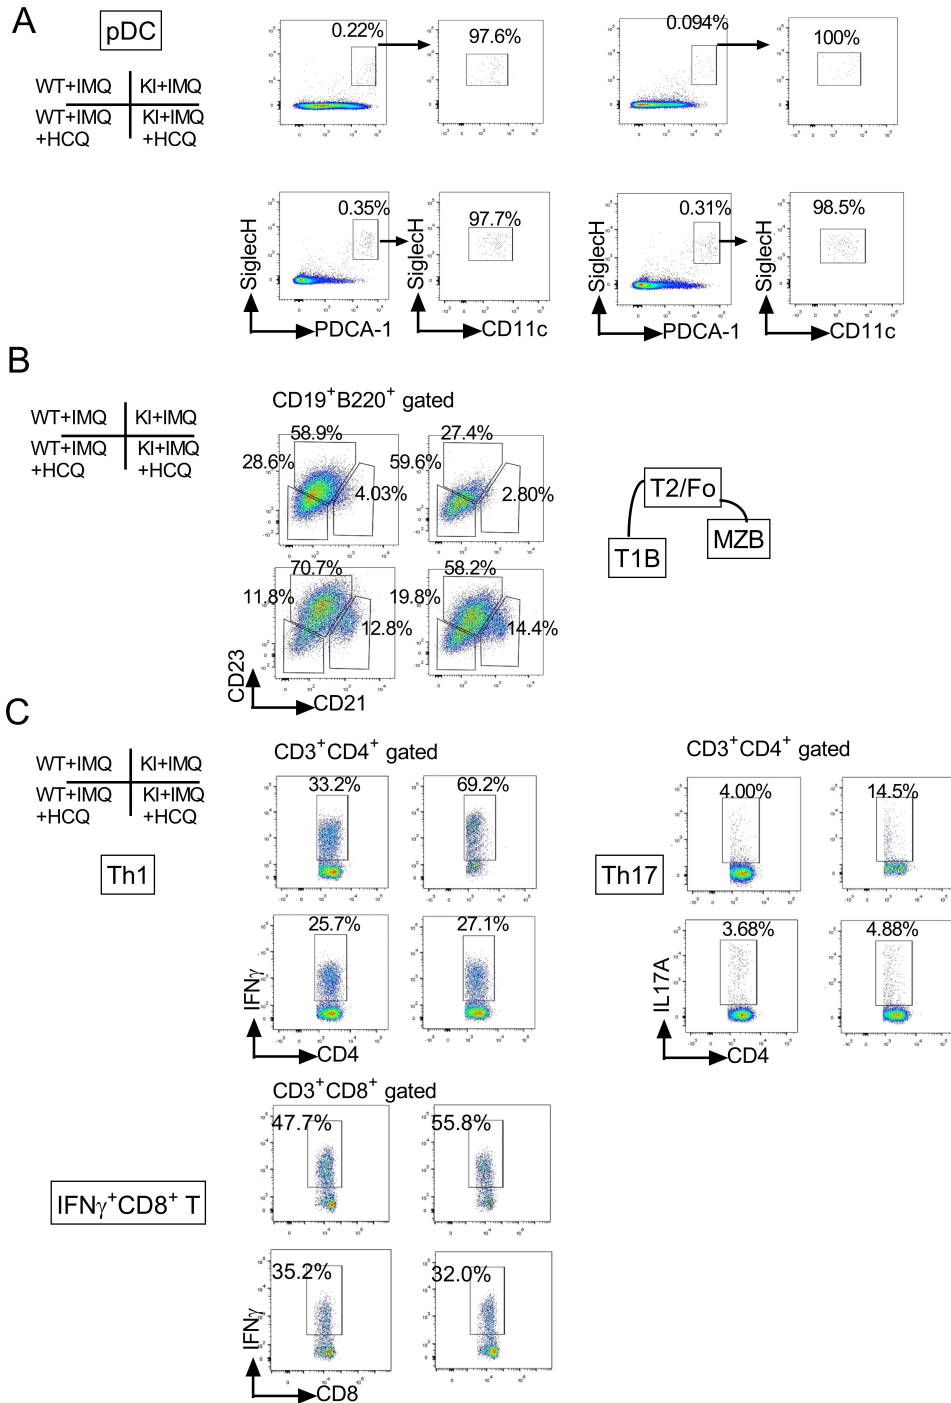

177

178 **Supplemental Figure 11. FACS analysis of immune cells suppressed by HCQ.** The  
 179 FACS gating strategies of (A) pDCs (CD11c<sup>int</sup>, Siglech<sup>+</sup>, PDCA-1<sup>+</sup>), (B) B cell  
 180 subsets, including MZB (CD19<sup>+</sup>, B220<sup>+</sup>, CD21<sup>hi</sup>, CD23<sup>-</sup>), T1 B (CD19<sup>+</sup>, B220<sup>+</sup>,  
 181 CD21<sup>-</sup>, CD23<sup>-</sup>) and T2/Fo B cells (CD19<sup>+</sup>, B220<sup>+</sup>, CD21<sup>lo</sup>, CD23<sup>hi</sup>), and (C) T cell  
 182 subsets, including Th1 (CD3<sup>+</sup>, CD4<sup>+</sup>, IFN $\gamma$ <sup>+</sup>), Th17 (CD3<sup>+</sup>, CD4<sup>+</sup>, IL17A<sup>+</sup>) and IFN $\gamma$ <sup>+</sup>  
 183 CD8<sup>+</sup> T cells (CD3<sup>+</sup>, CD8<sup>+</sup>, IFN $\gamma$ <sup>+</sup>) in Figure 8 are shown.

184

185

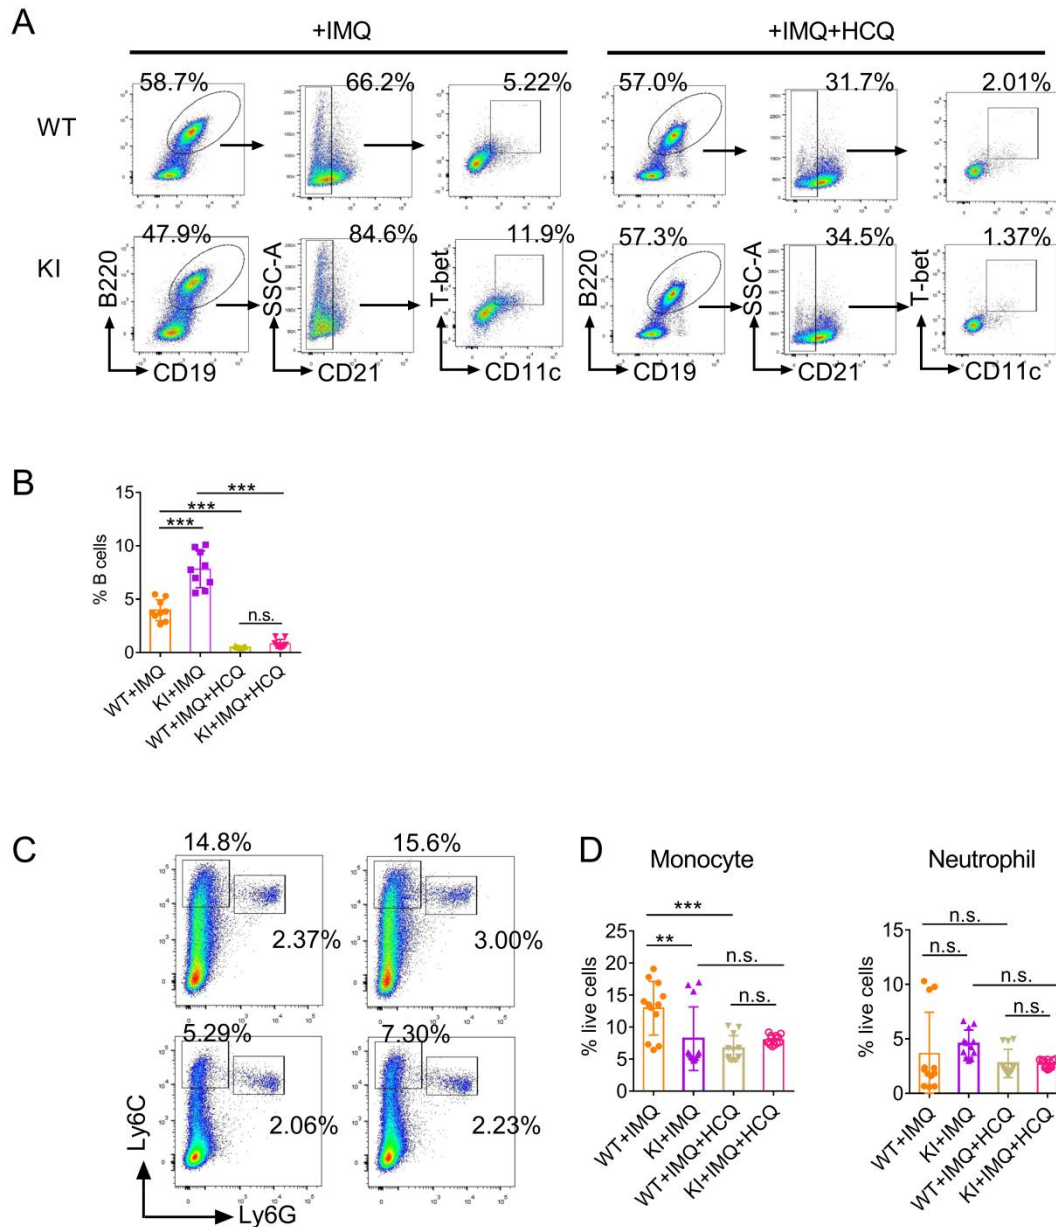

186

187 **Supplemental Figure 12. Impact of NCF1 p.R90H and HCQ on ABCs, monocytes**  
 188 **and neutrophils.** WT and KI mice were treated with IMQ, together with or without  
 189 HCQ for 8 weeks. Splenocytes were isolated and analyzed by FACS. (A) Gating  
 190 strategy of ABCs (CD19<sup>+</sup>, B220<sup>+</sup>, CD21<sup>-</sup>, CD11c<sup>+</sup>, T-bet<sup>+</sup>). n=9. (B) The proportion of  
 191 ABCs. (C) FACS analysis of monocytes (Ly6C<sup>hi</sup>, Ly6G<sup>-</sup>) and neutrophils (Ly6C<sup>lo</sup>,  
 192 Ly6G<sup>+</sup>). (D) Statistics of monocytes and neutrophils. *p* values were determined by  
 193 one-way ANOVA with Tukey's multiple comparison test. Error bars represent SEM.  
 194 (\*\**p*<0.01, \*\*\**p*<0.001, n.s. not significant).

195

196

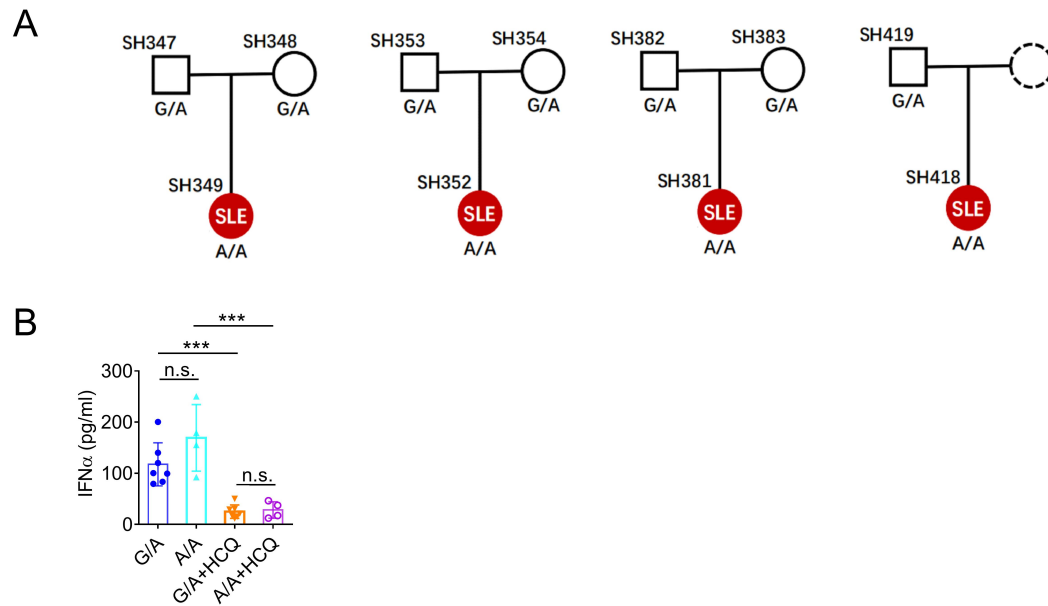

197

198 **Supplemental Figure 13. The therapeutic effect of HCQ on PBMCs from SLE**

199 **patients with NCF1 p.R90H.** (A) The genetic map of SLE families. (B) PBMCs

200 were pre-incubated with 0.5 $\mu$ M HCQ for 2 hours and stimulated with CpG for 24

201 hours. The expression of IFN $\alpha$  was detected. SH indicates sample number. *p* values

202 were determined by one-way ANOVA with Tukey's multiple comparison test. Error

203 bars represent SEM. (\*\*\*)*p*<0.001, n.s. not significant).

204

205

206

207

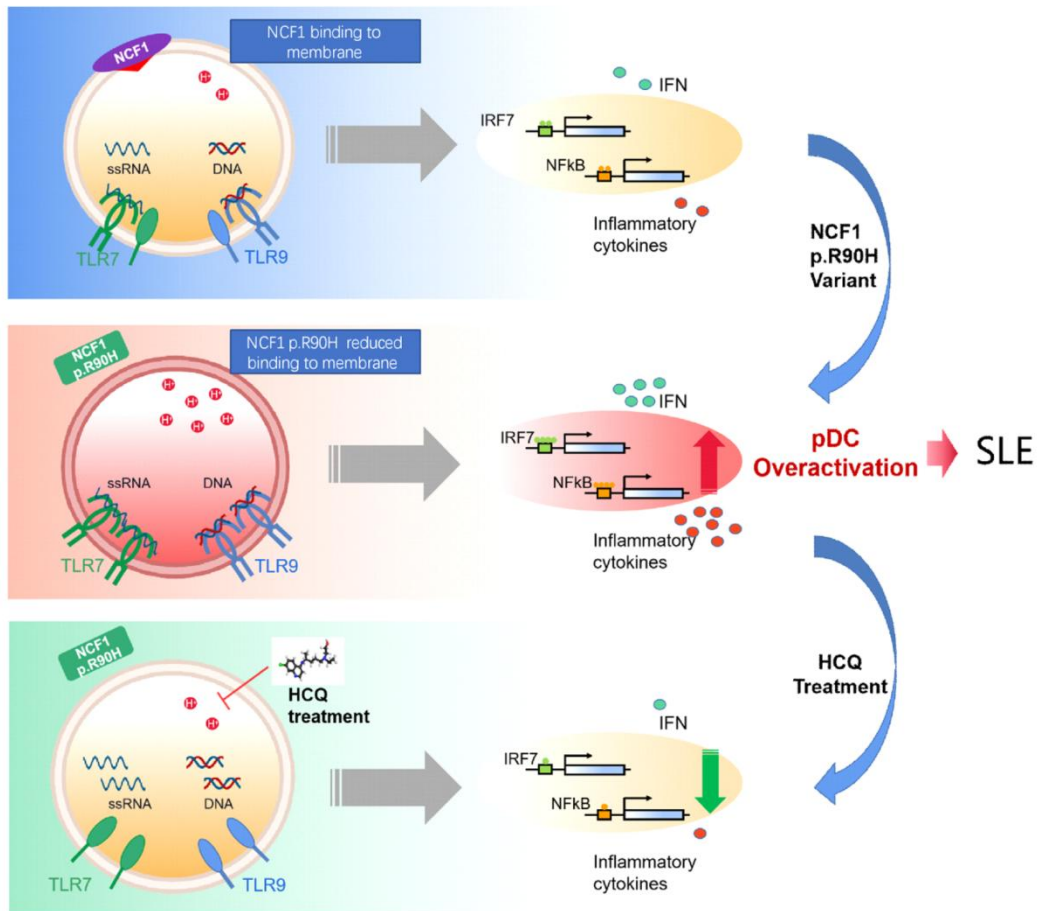

208

209 **Supplemental Figure 14. Regulation model.** NCF1 p.R90H variant leads to  
 210 impaired localization of NCF1 on the endosomal membrane, followed by acidified pH  
 211 and more cleaved activation of TLR receptors, which facilitates pDC activation and  
 212 lupus progression. HCQ application alleviates the aggravation of NCF1 p.R90H on  
 213 lupus, and this SNP could serve as a genetic biomarker for HCQ treatment.

214

215

216

217

218

219



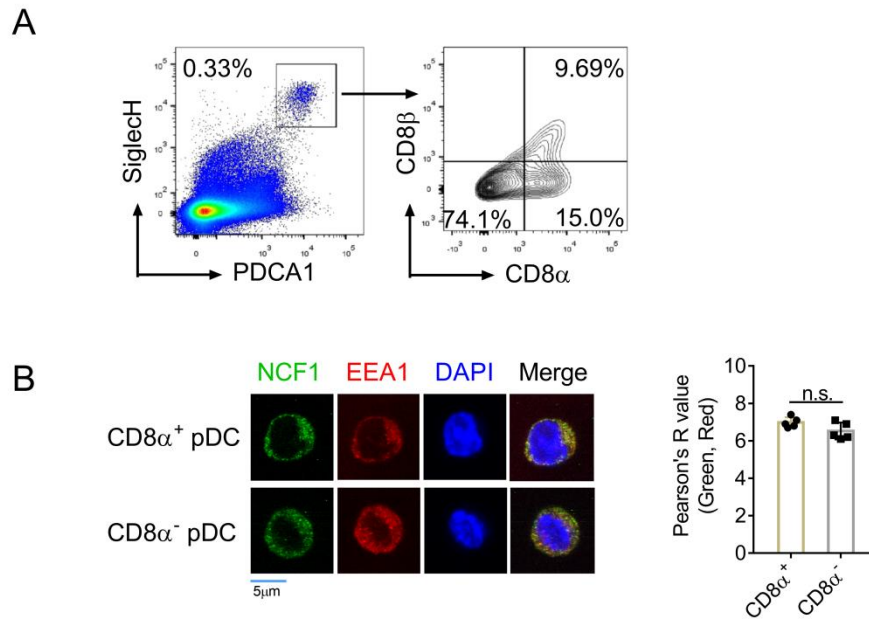

220

221 **Supplemental Figure 15. CD8 $\alpha^-$  and CD8 $\alpha^+$  pDCs show similar endosomal**  
 222 **localization of NCF1.** Splenic pDCs subsets were isolated and stimulated with  
 223 10 $\mu$ g/mL R848 for 1 hour. The colocalization of NCF1 and EEA1 was detected by  
 224 fluorescence microscope. (A) The gating strategy of pDC subsets. (B) The  
 225 co-localization of NCF1 (green) and EEA1 (Red) was detected by confocal  
 226 microscopy and analyzed by Image J. One point indicates mean of Pearson's R values  
 227 from 6 cells and total of 30 cells per group were calculated. Scale bar represents 5  $\mu$ m.  
 228 *p* value was determined by a two-tailed unpaired *t* test. Error bars represent SEM. (n.s.  
 229 not significant).

230

231

232

233

234

235

236

237

238

239

240 **Supplemental Tables**241 **Supplemental Table 1. Demographic and clinical characteristics of the patients.**

|                                           | SLE patients    |
|-------------------------------------------|-----------------|
| Number                                    | 49              |
| Age (years), mean $\pm$ SD                | 35.4 $\pm$ 10.5 |
| Female, n (%)                             | 49 (100%)       |
| Disease Duration (months), median (IQR) * | 53.8 (105)      |
| <b>System involvement, n (%) * ¶</b>      |                 |
| Mucocutaneous                             | 12 (30.0%)      |
| Musculoskeletal                           | 3 (7.5%)        |
| Neuropsychiatric                          | 1 (2.5%)        |
| Cardiorespiratory                         | 4 (10.0%)       |
| Renal                                     | 19 (47.5%)      |
| Hematological                             | 16 (40.0%)      |
| <b>Disease assessment, median (IQR) *</b> |                 |
| SLEDAI                                    | 7.0 (6.0)       |
| <b>Laboratory tests</b>                   |                 |
| High ESR, (positive/tested)               | 24/38           |
| High CRP, (positive/tested)               | 10/20           |
| Low C3, (positive/tested)                 | 30/40           |
| ANA, (positive/tested)                    | 37/38           |

|                                        |             |
|----------------------------------------|-------------|
| Anti-Smith antibody, (positive/tested) | 4/38        |
| Anti-RNP antibody, (positive/tested)   | 14/38       |
| Anti-dsDNA (IU/mL), median (IQR) *     | 26.2 (41.0) |
| <b>Treatment, n (%) #</b>              |             |
| Prednisone                             | 37 (100%)   |
| Hydroxychloroquine                     | 22 (59.5%)  |
| Immunosuppressants                     | 14 (37.8%)  |

242 *SLEDAI* Systemic Lupus Erythematosus Disease Activity Index, *ESR* Erythrocyte sedimentation  
243 rate, *CRP* C-Reactive Protein, *C3* complement 3, *ANA* anti-nuclear antibody, *RNP*  
244 ribonucleoprotein.

245 \* Among the 49 patients, 9 patients' clinical information were missing. The percentage calculation  
246 was based on 40 patients. # 12 patients' treatment information were missing. The percentage  
247 calculation was based on 37 patients. ¶ System involvement indicated all the system involvements  
248 during the disease course of the patients.

249

250

251

252

253

254

255

256

257

258

259

**Supplemental Table 2. SLE families information.**

|                    |                         | 23      |                 |                 | 24      |                 |                 | 35      |                 |                 | 47      |                 |
|--------------------|-------------------------|---------|-----------------|-----------------|---------|-----------------|-----------------|---------|-----------------|-----------------|---------|-----------------|
| sample ID          |                         | SH349   | SH350           | SH351           | SH352   | SH353           | SH354           | SH381   | SH382           | SH383           | SH418   | SH419           |
| gender             |                         | Female  | Male            | Female          | Female  | Male            | Female          | Female  | Male            | Female          | Female  | Male            |
| patient_age        |                         | 6       | 37              | 34              | 11      |                 |                 | 14      | 42              | 37              | 13      | 35              |
| relationship       |                         | Patient | Father of SH349 | Mother of SH349 | Patient | Father of SH352 | Mother of SH352 | Patient | Father of SH381 | Mother of SH381 | Patient | Father of SH418 |
| Autoimmune disease | SLE                     | y       | n               | n               | y       | n               | n               | y       | n               | n               | y       | n               |
|                    | Hashimoto's Thyroiditis | n       |                 |                 | n       |                 |                 | n       |                 |                 | n       |                 |
|                    | Grave's disease         | n       |                 |                 | n       |                 |                 | n       |                 |                 | n       |                 |
|                    | T1D                     | n       |                 |                 | n       |                 |                 | n       |                 |                 | n       |                 |
|                    | Vitiligo                | n       |                 |                 | n       |                 |                 | n       |                 |                 | n       |                 |
|                    | Alopecia                | n       |                 |                 | n       |                 |                 | n       |                 |                 | n       |                 |
|                    | RA                      | n       |                 |                 | n       |                 |                 | n       |                 |                 | n       |                 |
|                    | Sjogren's Sd            | n       |                 |                 | n       |                 |                 | n       |                 |                 | n       |                 |
|                    | Vasculitis              | n       |                 |                 | n       |                 |                 | n       |                 |                 | n       |                 |
| Other              |                         |         |                 |                 |         |                 |                 |         |                 |                 |         |                 |
| Lupus ACR          | Acute Cutaneous lupus   | y       |                 |                 | y       |                 |                 | y       |                 |                 | y       |                 |

|          |                                           |                  |  |  |                    |  |  |                 |  |  |                    |  |  |
|----------|-------------------------------------------|------------------|--|--|--------------------|--|--|-----------------|--|--|--------------------|--|--|
| criteria | Chronic cutaneous lupus                   |                  |  |  |                    |  |  |                 |  |  |                    |  |  |
|          | Aphthous ulcers                           | n                |  |  | y                  |  |  | y               |  |  | y                  |  |  |
|          | Alopecia                                  | n                |  |  | n                  |  |  | n               |  |  | n                  |  |  |
|          | Arthritis (2 or more joints)              | y                |  |  | y                  |  |  | y               |  |  | n                  |  |  |
|          | Serositis                                 | n                |  |  | n                  |  |  | n               |  |  | n                  |  |  |
|          | Renal: Red cell casts                     | n                |  |  | y                  |  |  | n               |  |  | y                  |  |  |
|          | Renal: >500g protein/24h                  | n                |  |  | n                  |  |  | n               |  |  | y                  |  |  |
|          | Neurological: Seizures                    | n                |  |  | n                  |  |  | n               |  |  | n                  |  |  |
|          | Neurological: Psychosis                   | n                |  |  | n                  |  |  | n               |  |  | n                  |  |  |
|          | Neurological: myelitis                    | n                |  |  | n                  |  |  | n               |  |  | n                  |  |  |
|          | Autoimmune hemolytic anemia               | n                |  |  | n                  |  |  | n               |  |  | n                  |  |  |
|          | Leukopenia:<4.0 ×10 <sup>9</sup> /L       | n                |  |  | n                  |  |  | n               |  |  | n                  |  |  |
|          | Lymphopenia:<1.0 ×10 <sup>9</sup> /L      | n                |  |  | n                  |  |  | y               |  |  | n                  |  |  |
|          | Thrombocytopenia:<1.0 ×10 <sup>9</sup> /L | n                |  |  | n                  |  |  | n               |  |  | n                  |  |  |
|          | ANA                                       | 1: 640           |  |  | 1:160              |  |  | 1: 320          |  |  |                    |  |  |
|          | dsDNA antibodies (IU/ml)                  | 8.4<br>IU/M<br>L |  |  | 28.94<br>IU/M<br>L |  |  | 65<br>IU/<br>ML |  |  | 45.98<br>IU/M<br>L |  |  |
|          | Sm                                        | n                |  |  | n                  |  |  | y               |  |  |                    |  |  |

|                                |                                               |                  |  |  |                  |  |  |                  |  |  |                  |  |
|--------------------------------|-----------------------------------------------|------------------|--|--|------------------|--|--|------------------|--|--|------------------|--|
|                                | Lupus anticoagulant                           | n                |  |  | n                |  |  | y                |  |  |                  |  |
|                                | Cardiolipin antibodies (medium or high titre) | n                |  |  | n                |  |  | n                |  |  |                  |  |
|                                | beta-2 glycoprotein I antibodies              | n                |  |  | n                |  |  | n                |  |  |                  |  |
|                                | Direct Coombs Test                            | n                |  |  | n                |  |  | n                |  |  |                  |  |
|                                | Low C3                                        | n                |  |  | y                |  |  | y                |  |  | y                |  |
|                                | Low C4                                        | n                |  |  | n                |  |  | y                |  |  | y                |  |
| Additional lupus phenotypes: a | Raynaud's phenomenon                          | n                |  |  | n                |  |  | n                |  |  | n                |  |
|                                | Digital vasculitis                            | n                |  |  | n                |  |  | n                |  |  | n                |  |
|                                | Cutaneous vasculitis                          | n                |  |  | n                |  |  | n                |  |  | n                |  |
|                                | Arterial thrombosis                           | n                |  |  | n                |  |  | n                |  |  | n                |  |
|                                | Deep venous thrombosis                        | n                |  |  | n                |  |  | n                |  |  | n                |  |
|                                | Acute pulmonary embolus                       | n                |  |  | n                |  |  | n                |  |  | n                |  |
| Additional lupus phenotypes: b | Renal                                         | n                |  |  | n                |  |  | n                |  |  | y                |  |
|                                | WHO Glomerulonephritis histological class     |                  |  |  |                  |  |  |                  |  |  |                  |  |
|                                | Nephrotic syndrome                            | n                |  |  | n                |  |  | n                |  |  | n                |  |
|                                | Highest serum creatinine (umol/L)             | 24<br>umol/<br>L |  |  | 58<br>umol/<br>L |  |  | 30<br>umol<br>/L |  |  | 34<br>umol/<br>L |  |
|                                | Lowest GFR                                    |                  |  |  |                  |  |  |                  |  |  |                  |  |



|                  |                      |   |  |  |   |  |  |   |  |  |   |  |
|------------------|----------------------|---|--|--|---|--|--|---|--|--|---|--|
| Additional       | Dry mouth            | y |  |  | y |  |  | y |  |  | y |  |
| lupus            |                      |   |  |  |   |  |  |   |  |  |   |  |
| phenotypes: c    |                      |   |  |  |   |  |  |   |  |  |   |  |
| Sicca            | Dry eyes             |   |  |  |   |  |  |   |  |  |   |  |
| symptoms         |                      | n |  |  | n |  |  | n |  |  | n |  |
| Additional       | Tenosynovitis        | n |  |  | n |  |  | n |  |  | n |  |
| lupus            | Joint subluxation    | n |  |  | n |  |  | y |  |  | n |  |
| phenotypes: d    |                      |   |  |  |   |  |  |   |  |  |   |  |
| Musculoskeletal  | Myositis             |   |  |  |   |  |  |   |  |  |   |  |
| tal              |                      | n |  |  | n |  |  | n |  |  | n |  |
| Additional       | Hepatitis            | n |  |  | n |  |  | n |  |  | n |  |
| lupus            | Mesenteric ischaemia | n |  |  | n |  |  | n |  |  | n |  |
| phenotypes: e    |                      |   |  |  |   |  |  |   |  |  |   |  |
| Gastrointestinal | Pancreatitis         |   |  |  |   |  |  |   |  |  |   |  |
| al               |                      | n |  |  | n |  |  | n |  |  | n |  |
| Additional       | RNP                  | n |  |  | y |  |  | y |  |  | n |  |
| lupus            | SSA                  | n |  |  | n |  |  | y |  |  | n |  |
| phenotypes: g    | SSB                  | n |  |  | n |  |  | y |  |  | n |  |
| Serology         | Ribosomal P          | n |  |  | n |  |  | n |  |  | n |  |
|                  | Smooth muscle        | n |  |  | n |  |  | n |  |  |   |  |
|                  | Thyroidperoxidase    | n |  |  | n |  |  | n |  |  |   |  |

|  |                         |   |  |  |   |  |  |   |  |  |   |  |
|--|-------------------------|---|--|--|---|--|--|---|--|--|---|--|
|  | Thyroglobulin           | n |  |  | n |  |  | n |  |  |   |  |
|  | Gastric parietal cell   | n |  |  | n |  |  | n |  |  |   |  |
|  | Skin                    | n |  |  | n |  |  | y |  |  | y |  |
|  | Hypergammaglobulinaemia | n |  |  | n |  |  | n |  |  |   |  |
|  | Other                   |   |  |  |   |  |  |   |  |  |   |  |

261

262 “y” = Yes, “n” = No.

263

264

265

266

267

268

269

270

271

272

273

274

275

276

277

278 **Supplemental Table 3. List of antibodies and reagents**279 **Murine antibodies**

| <b>Antibodies</b>                           | <b>Source</b> | <b>Cat#</b> |
|---------------------------------------------|---------------|-------------|
| Anti-mouse PDCA1-BV421                      | BioLegend     | 127023      |
| Anti-mouse CD4-FITC                         | BioLegend     | 100406      |
| Anti-mouse CD21-APC                         | BioLegend     | 123412      |
| Anti-mouse B220-PE-CY7                      | BioLegend     | 103222      |
| Anti-mouse MHCII-BV510                      | BioLegend     | 107636      |
| Anti-mouse CD11c-percp5.5                   | BioLegend     | 136504      |
| Anti-mouse CD62L-BV510                      | BioLegend     | 104441      |
| Anti-mouse CD11c-FITC                       | BioLegend     | 117306      |
| Anti-mouse CD19-BV510                       | BioLegend     | 115546      |
| Anti-mouse CD44-PE-CY7                      | BioLegend     | 103030      |
| Anti-mouse CD23-FITC                        | BioLegend     | 101606      |
| Anti-mouse CD3-APC                          | BioLegend     | 100236      |
| Anti-mouse CD172a-APC                       | BioLegend     | 144014      |
| Anti-mouse CD8 $\alpha$ -Percp-cy5.5        | BioLegend     | 100736      |
| Anti-mouse SiglecH-PE                       | eBioscience   | 12-0333-82  |
| Total IRF7 antibody                         | Santa Cruz    | sc-74471    |
| Anti-EEA1                                   | Abcam         | ab2900      |
| Goat Anti-Rabbit IgG H&L (Alexa Fluor® 647) | Abcam         | ab150083    |

|                                                                              |                           |            |
|------------------------------------------------------------------------------|---------------------------|------------|
| Donkey polyclonal Secondary Antibody to Goat IgG<br>- H&L (Alexa Fluor® 488) | Abcam                     | ab150129   |
| Goat polyclonal to NCF1/p47-phox                                             | Abcam                     | ab166930   |
| Rabbit polyclonal to RAC2                                                    | Abcam                     | ab191527   |
| Alexa Fluor® 647 anti-mouse CD107a (LAMP-1)<br>Antibody                      | Biolegend                 | 121610     |
| Alexa Fluor® 647 Goat anti-mouse IgG (minimal<br>x-reactivity) Antibody      | Biolegend                 | 405322     |
| Anti-mouse IFN $\gamma$ -APC                                                 | BD                        | 562018     |
| Anti-mouse IL-17A-PE                                                         | BD                        | 561020     |
| DAPI                                                                         | BD                        | 564907     |
| $\beta$ -Actin (13E5) Rabbit mAb                                             | Cell Signaling Technology | #4970      |
| Anti-rabbit IgG, HRP-linked Antibody                                         | Cell Signaling Technology | #7074      |
| Anti-mouse IgG, HRP-linked Antibody                                          | Cell Signaling Technology | #7076      |
| Phospho-IRF7 (Ser437/438) (D6M2I) Rabbit mAb                                 | Cell Signaling Technology | #24129     |
| NF- $\kappa$ B p65 (D14E12) XP® Rabbit mAb                                   | Cell Signaling Technology | #8242      |
| Phospho-NF- $\kappa$ B p65 (Ser536) (93H1) Rabbit mAb                        | Cell Signaling Technology | #3033      |
| Catalase (D5N7V) Rabbit mAb                                                  | Cell Signaling Technology | #14097     |
| Anti-TLR7                                                                    | Novus                     | NBP2-24906 |
| Anti-TLR9                                                                    | Novus                     | NBP2-24729 |
| Phospho-p47phox (Ser370) Polyclonal Antibody                                 | Thermo Fisher             | PA5-36863  |

|                                     |            |        |
|-------------------------------------|------------|--------|
| InVivoMAb anti-mouse CD317          | Bio X Cell | BE0311 |
| InVivoMAb rat IgG2b isotype control | Bio X Cell | BE0090 |

280

281 **Human antibodies**

| <b>Antibodies</b>                                                   | <b>Source</b> | <b>Cat#</b> |
|---------------------------------------------------------------------|---------------|-------------|
| Anti-human CD19-BV650                                               | BioLegend     | 302238      |
| Anti-human CD38-BV605                                               | BioLegend     | 303532      |
| Anti-human IgD-BV510                                                | BioLegend     | 348220      |
| Anti-human CD8-pacific blue                                         | BioLegend     | 301033      |
| Anti-human PD1-PE-CF594                                             | BioLegend     | 329940      |
| Anti-human CXCR3-PE                                                 | BioLegend     | 353705      |
| APC anti-human Lineage Cocktail (CD3, CD14, CD16, CD19, CD20, CD56) | Biolegend     | 348803      |
| Anti-human CD24-BV711                                               | BD            | 563401      |
| Anti-human CD11c-BUV395                                             | BD            | 563787      |
| Anti-human CD3-BV786                                                | BD            | 563799      |
| Anti-human CD4-BUV496                                               | BD            | 564651      |
| Anti-human CXCR5-AF647                                              | BD            | 558113      |
| Anti-human CD25-APC-R700                                            | BD            | 565106      |
| Anti-human CD127-BB700                                              | BD            | 566398      |
| Anti-human CD56-BUV737                                              | BD            | 564447      |

|                                        |             |            |
|----------------------------------------|-------------|------------|
| Anti-human CD123-PECY7                 | BD          | 560826     |
| Anti-human CD11c-percepcy5.5           | BD          | 565227     |
| Anti-human HLA-DR-FITC                 | BD          | 555811     |
| Anti-human AXL-APC                     | R&D         | FAB154A    |
| Anti-human CD27-APC-EF780              | eBioscience | 47-0279    |
| Anti-human CD45RA-PE-CY7               | eBioscience | 25-0458-73 |
| Fc block                               | BioLegend   | 422301     |
| LIVE/DEAD® Stain Kit Green Fluorescent | Invitrogen  | L23101     |

282

283 **Reagents and kits**

| <b>Reagents</b>                   | <b>Source</b>    | <b>Cat#</b> |
|-----------------------------------|------------------|-------------|
| 2-Deoxy-D-glucose (2-DG)          | Selleck Chemical | S4701       |
| Acetylcysteine (N-acetylcysteine) | Selleck Chemical | S1623       |
| Etomoxir sodium salt              | Selleck Chemical | S8244       |
| Metformin HCl                     | Selleck Chemical | S1950       |
| Hydroxychloroquine Sulfate        | Selleck Chemical | S4430       |
| Bafilomycin A1                    | Selleck Chemical | S1423       |
| 2-Guanidinobenzimidazole          | Sigma            | G11802      |
| Cell Staining Buffer              | BioLegend        | 420210      |
| Recombinant Murine Flt3-Ligand    | Peprtech         | 250-31L     |
| Mouse IFN-alpha ELISA Kit         | R&D              | 42120       |

|                                                |                                        |            |
|------------------------------------------------|----------------------------------------|------------|
| Human IFN-alpha ELISA Kit                      | R&D                                    | 41100      |
| Mouse IFN-beta ELISA Kit                       | R&D                                    | 42400      |
| ELISA MAX™ Deluxe Set Mouse IL6                | Biolegend                              | 431304     |
| ELISA MAX™ Deluxe Set Mouse TNF $\alpha$       | Biolegend                              | 430904     |
| R848 (Resiquimod)                              | Invivogen                              | tlrl-r848  |
| ODN 2216                                       | Invivogen                              | tlrl-2216  |
| PtdIns-(3,4)-P2 (1,2-dihexanoyl) (sodium salt) | Cayman Chemical                        | 10007759   |
| 1-Palmitoyl-3-oleoyl-sn-glycero-2-PE           | Cayman Chemical                        | 15104      |
| 1-Palmitoyl-2-oleoyl-sn-glycero-3-PC           | Cayman Chemical                        | 15102      |
| LBIS Mouse IgG Rheumatoid Factor ELISA Kit     | FUJIFILM Wako<br>Shibayagi Corporation | 637-02679  |
| LBIS Mouse IgM Rheumatoid Factor ELISA Kit     | FUJIFILM Wako<br>Shibayagi Corporation | 634-02689  |
| LBIS Mouse anti-dsDNA ELISA Kit                | FUJIFILM Wako<br>Shibayagi Corporation | 631-02699  |
| OxyBURST™ Green H2DCFDA                        | Thermo Fisher                          | D2935      |
| LysoSensor™ Green DND-189                      | Thermo Fisher                          | L7535      |
| TaqMan™ Genotyping Master Mix                  | Thermo Fisher                          | 4371353    |
| MitoSOX™ Red                                   | Thermo Fisher                          | M36008     |
| SuperBlock™ (TBS) Blocking Buffer              | Thermo Fisher                          | 37535      |
| Anti-Mouse/Rat Foxp3 Staining Set PE           | eBioscience                            | 72-5775-40 |

|                                                                |                  |                |
|----------------------------------------------------------------|------------------|----------------|
| BD™ Cytometric Bead Array (CBA) Mouse TNF<br>Flex Set          | BD               | 558299         |
| BD™ Cytometric Bead Array (CBA) Mouse IL6<br>Flex Set          | BD               | 558301         |
| Fixation/Permeabilization Solution Kit with BD<br>GolgiStop™   | BD               | 554715         |
| Long Range PCR kit                                             | Qiagen           | 206402         |
| Diamond Plasmacytoid Dendritic Cell Isolation Kit<br>II, human | Miltenyi Biotech | 130-097-240    |
| pLKO.1-shRac2-puro-CMV-tGFP lentivirus                         | Sigma            | TRCN0000065343 |

284

285

286

287

288

289

290

291

292

293

294

295



296 **Supplemental Table 4. Primers used in this study.**

| Genes                   | Forward primer (5'-3')         | Reverse primer (5'-3')              |
|-------------------------|--------------------------------|-------------------------------------|
| mouse mx1               | CTGAGGGCTCTGGGTGT              | GTAACAATACCACTGCCTCTG               |
| mouse irf7              | CCTGATCCTGGTGAAGCTGG           | TGGGAGTTGGGATTCTGAGTC               |
| mouse oas1              | TTTGAGCAGGTAGAAGAGAACT         | GCATCAGAAGCACGGAGT                  |
| mouse isg15             | AGAGCAAGCAGCCAGAAG             | CACCGTCATGGAGTTAGTCAC               |
| mouse ifit1             | ATGGGAGAGAATGCTGATGG           | AGGAACTGGACCTGCTCTGA                |
| mouse $\beta$ -actin    | ATGCTCCCCGGGCTGTAT             | CATAGGAGTCCTTCTGACCCATTC            |
| mouse Catalase<br>clone | GGAATTCATGTCGGACAGTCGGGAC<br>C | GGCGGCCGCTTACAGGTTAGCTTTT<br>CCCTTC |
| human mx1               | GGGTAGCCACTGGACTGA             | AGGTGGAGCGATTCTGAG                  |
| human ifit1             | GCCTCCTTGGGTTTCGTCTACAA        | TCAAAGTCAGCAGCCAGTCTCA              |
| human oas1              | GAAGGCAGCTCACGAAAC             | TTCTTAAAGCATGGGTAATTC               |
| human irf7              | TGAAGCTGGAACCCTGG              | GATGTCGTCATAGAGGCTGTT               |
| Human rpl13a            | CCTGGAGGAGAAGAGGAAAGAGA        | TTGAGGACCTCTGTGTATTTGTCAA           |

297

298 **Taqman assay for *NCF1* genotyping**

|              | Forward primer           | Reverse primer        | Reporter 1 Sequence | Reporter 2 Sequence |
|--------------|--------------------------|-----------------------|---------------------|---------------------|
| NCF1 p. R90H | CAGCTCCCAAG<br>TGGTTTGAC | GGTGGGCA<br>GGCTCATGA | CCTGGCGGTTCT<br>C   | CCTGGTGGTT<br>CTC   |

299
